# Supplementary material
Source: PubMed Central journal article supplement (PMC6312009)
Supplement: 2018_205948-Disclosures_and_Contributions.pdf [file 2018_205948-Disclosures_and_Contributions.pdf]

Haematologica  
HAEMATOL/2018/205948  
Version 1

Gemtuzumab ozogamicin in acute myeloid leukemia: act 2, with  
perhaps more to come

Johann Hitzler and Elihu Estey

Disclosures: Nothing to disclose

Contributions: The authors have equally contributed
